# Supplementary material
Source: PubMed Central journal article supplement (PMC3906822)
Supplement: ismej2013163x1.pdf [file ismej2013163x1.pdf]

| Date   | Pot | Contaminated | Planted | C10-C50<br>mg/kg | Acenaphtene<br>mg/kg | Acenaphtylene<br>mg/kg | Anthracene<br>mg/kg | Benzo(a)anthracene<br>mg/kg | Benzo(a)pyrene<br>mg/kg |
|--------|-----|--------------|---------|------------------|----------------------|------------------------|---------------------|-----------------------------|-------------------------|
| Oct-11 | 22  | C            | NP      | 500              | 1.2                  | 0.9                    | 4.7                 | 1.1                         | 0.4                     |
| Oct-11 | 62  | C            | NP      | 4200             | 6.7                  | 2.3                    | 26.9                | 5.6                         | 1.3                     |
| Oct-11 | 69  | C            | NP      | 1600             | 1                    | 0.3                    | 3.8                 | 1.2                         | 0.2                     |
| Oct-11 | 72  | C            | NP      | 1720             | 1.1                  | 0.9                    | 8                   | 3                           | 0.7                     |
| Oct-11 | 74  | C            | NP      | 1680             | 6.1                  | 1.2                    | 12.8                | 3.1                         | 0.7                     |
| Oct-11 | 77  | C            | NP      | 2230             | 2.3                  | 2                      | 14.3                | 3.1                         | 1.1                     |
| Oct-11 | 27  | C            | P       | 690              | 5.3                  | 1.9                    | 9.9                 | 2.9                         | 0.7                     |
| Oct-11 | 29  | C            | P       | 1430             | 2.6                  | 1                      | 4.8                 | 1.5                         | 0.4                     |
| Oct-11 | 33  | C            | P       | 510              | 2.3                  | 0.6                    | 4                   | 1.3                         | 0.4                     |
| Oct-11 | 38  | C            | P       | 1190             | 5.7                  | 1.1                    | 11.8                | 2.9                         | 0.6                     |
| Oct-11 | 42  | C            | P       | 480              | 0.2                  | 0.6                    | 3.8                 | 0.6                         | 0.3                     |
| Oct-11 | 78  | C            | P       | 1170             | 4.6                  | 1.5                    | 14.3                | 4.3                         | 1                       |
| Oct-11 | 114 | NC           | NP      | <100             | <0.1                 | <0.1                   | <0.1                | <0.1                        | <0.1                    |
| Oct-11 | 116 | NC           | NP      | <100             | <0.1                 | <0.1                   | <0.1                | <0.1                        | <0.1                    |
| Oct-11 | 138 | NC           | NP      | <100             | <0.1                 | <0.1                   | <0.1                | <0.1                        | <0.1                    |
| Oct-11 | 142 | NC           | NP      | <100             | <0.1                 | <0.1                   | <0.1                | <0.1                        | <0.1                    |
| Oct-11 | 143 | NC           | NP      | <100             | <0.1                 | <0.1                   | <0.1                | <0.1                        | <0.1                    |
| Oct-11 | 157 | NC           | NP      | <100             | <0.1                 | <0.1                   | <0.1                | <0.1                        | <0.1                    |
| Oct-11 | 122 | NC           | P       | <100             | <0.1                 | <0.1                   | <0.1                | <0.1                        | <0.1                    |
| Oct-11 | 124 | NC           | P       | <100             | <0.1                 | <0.1                   | <0.1                | <0.1                        | <0.1                    |
| Oct-11 | 128 | NC           | P       | <100             | <0.1                 | <0.1                   | <0.1                | <0.1                        | <0.1                    |
| Oct-11 | 149 | NC           | P       | <100             | <0.1                 | <0.1                   | <0.1                | <0.1                        | <0.1                    |
| Oct-11 | 154 | NC           | P       | <100             | <0.1                 | <0.1                   | <0.1                | <0.1                        | <0.1                    |
| Oct-11 | 155 | NC           | P       | 110              | <0.1                 | <0.1                   | <0.1                | <0.1                        | <0.1                    |
| Apr-12 | 22  | C            | NP      | 600              | <0.1                 | 0.3                    | 2.6                 | 0.1                         | 0.1                     |
| Apr-12 | 62  | C            | NP      | 380              | 0.2                  | 0.7                    | 4.7                 | 0.5                         | 0.3                     |
| Apr-12 | 69  | C            | NP      | 470              | <0.1                 | 0.5                    | 3.6                 | 0.2                         | 0.1                     |
| Apr-12 | 72  | C            | NP      | 410              | <0.1                 | 0.4                    | 2.4                 | 0.2                         | 0.1                     |
| Apr-12 | 74  | C            | NP      | 330              | 0.3                  | 0.8                    | 6.1                 | 0.3                         | 0.2                     |
| Apr-12 | 77  | C            | NP      | 380              | 0.2                  | 0.8                    | 5.1                 | 0.6                         | 0.3                     |
| Apr-12 | 27  | C            | P       | 660              | 0.3                  | 0.6                    | 4                   | 0.8                         | 0.3                     |
| Apr-12 | 29  | C            | P       | 350              | <0.1                 | 0.4                    | 2.8                 | 0.2                         | 0.1                     |

| Date   | Pot | Contaminated | Planted | C10-C50<br>mg/kg | Acenaphtene<br>mg/kg | Acenaphtylene<br>mg/kg | Anthracene<br>mg/kg | Benzo(a)anthracene<br>mg/kg | Benzo(a)pyrene<br>mg/kg |
|--------|-----|--------------|---------|------------------|----------------------|------------------------|---------------------|-----------------------------|-------------------------|
| Apr-12 | 33  | C            | P       | 280              | <0.1                 | 0.3                    | 1.6                 | 0.1                         | <0.1                    |
| Apr-12 | 38  | C            | P       | 550              | 0.2                  | 0.7                    | 5.2                 | 0.4                         | 0.2                     |
| Apr-12 | 42  | C            | P       | 270              | 0.2                  | 0.3                    | 1.6                 | 0.2                         | <0.1                    |
| Apr-12 | 78  | C            | P       | 570              | 0.2                  | 0.3                    | 2.2                 | 0.3                         | 0.1                     |
| Apr-12 | 114 | NC           | NP      | <100             | <0.1                 | <0.1                   | <0.1                | <0.1                        | <0.1                    |
| Apr-12 | 116 | NC           | NP      | <100             | <0.1                 | <0.1                   | <0.1                | <0.1                        | <0.1                    |
| Apr-12 | 138 | NC           | NP      | <100             | <0.1                 | <0.1                   | <0.1                | <0.1                        | <0.1                    |
| Apr-12 | 142 | NC           | NP      | <100             | <0.1                 | <0.1                   | <0.1                | <0.1                        | <0.1                    |
| Apr-12 | 143 | NC           | NP      | <100             | <0.1                 | <0.1                   | <0.1                | <0.1                        | <0.1                    |
| Apr-12 | 157 | NC           | NP      | <100             | <0.1                 | <0.1                   | <0.1                | <0.1                        | <0.1                    |
| Apr-12 | 122 | NC           | P       | <100             | <0.1                 | <0.1                   | <0.1                | <0.1                        | <0.1                    |
| Apr-12 | 124 | NC           | P       | <100             | <0.1                 | <0.1                   | <0.1                | <0.1                        | <0.1                    |
| Apr-12 | 128 | NC           | P       | <100             | <0.1                 | <0.1                   | <0.1                | <0.1                        | <0.1                    |
| Apr-12 | 149 | NC           | P       | <100             | <0.1                 | <0.1                   | <0.1                | <0.1                        | <0.1                    |
| Apr-12 | 154 | NC           | P       | <100             | <0.1                 | <0.1                   | <0.1                | <0.1                        | <0.1                    |
| Apr-12 | 155 | NC           | P       | <100             | <0.1                 | <0.1                   | <0.1                | <0.1                        | <0.1                    |

| Date   | Pot | Contaminated | Planted | Benzo(b,j,k)fluoranthene | Benzo(c)phenanthrene | Benzo(g,h,i)perylene | Chrysene | Dibenzo(a,h)anthracene |
|--------|-----|--------------|---------|--------------------------|----------------------|----------------------|----------|------------------------|
|        |     |              |         | mg/kg                    | mg/kg                | mg/kg                | mg/kg    | mg/kg                  |
| Oct-11 | 22  | C            | NP      | 0.5                      | 0.6                  | 0.1                  | 1.3      | <0.1                   |
| Oct-11 | 62  | C            | NP      | 1.6                      | 2.6                  | 0.3                  | 6.8      | 0.2                    |
| Oct-11 | 69  | C            | NP      | 0.3                      | 0.6                  | <0.1                 | 1.4      | <0.1                   |
| Oct-11 | 72  | C            | NP      | 1                        | 1.6                  | 0.1                  | 3.8      | <0.1                   |
| Oct-11 | 74  | C            | NP      | 0.9                      | 1.6                  | 0.1                  | 3.9      | <0.1                   |
| Oct-11 | 77  | C            | NP      | 1.3                      | 1.7                  | 0.2                  | 2.8      | 0.1                    |
| Oct-11 | 27  | C            | P       | 0.9                      | 1.2                  | 0.2                  | 3        | <0.1                   |
| Oct-11 | 29  | C            | P       | 0.5                      | 0.8                  | <0.1                 | 1.7      | <0.1                   |
| Oct-11 | 33  | C            | P       | 0.5                      | 0.8                  | <0.1                 | 1.4      | <0.1                   |
| Oct-11 | 38  | C            | P       | 0.8                      | 1.4                  | 0.2                  | 3.3      | <0.1                   |
| Oct-11 | 42  | C            | P       | 0.3                      | 0.3                  | 0.1                  | 0.9      | <0.1                   |
| Oct-11 | 78  | C            | P       | 1.3                      | 2.4                  | 0.2                  | 5.3      | <0.1                   |
| Oct-11 | 114 | NC           | NP      | <0.1                     | <0.1                 | <0.1                 | <0.1     | <0.1                   |
| Oct-11 | 116 | NC           | NP      | <0.1                     | <0.1                 | <0.1                 | <0.1     | <0.1                   |
| Oct-11 | 138 | NC           | NP      | <0.1                     | <0.1                 | <0.1                 | <0.1     | <0.1                   |
| Oct-11 | 142 | NC           | NP      | <0.1                     | <0.1                 | <0.1                 | <0.1     | <0.1                   |
| Oct-11 | 143 | NC           | NP      | <0.1                     | <0.1                 | <0.1                 | <0.1     | <0.1                   |
| Oct-11 | 157 | NC           | NP      | <0.1                     | <0.1                 | <0.1                 | <0.1     | <0.1                   |
| Oct-11 | 122 | NC           | P       | <0.1                     | <0.1                 | <0.1                 | <0.1     | <0.1                   |
| Oct-11 | 124 | NC           | P       | <0.1                     | <0.1                 | <0.1                 | <0.1     | <0.1                   |
| Oct-11 | 128 | NC           | P       | <0.1                     | <0.1                 | <0.1                 | <0.1     | <0.1                   |
| Oct-11 | 149 | NC           | P       | <0.1                     | <0.1                 | <0.1                 | <0.1     | <0.1                   |
| Oct-11 | 154 | NC           | P       | <0.1                     | <0.1                 | <0.1                 | <0.1     | <0.1                   |
| Oct-11 | 155 | NC           | P       | <0.1                     | <0.1                 | <0.1                 | <0.1     | <0.1                   |
| Apr-12 | 22  | C            | NP      | <0.1                     | <0.1                 | <0.1                 | 0.2      | <0.1                   |
| Apr-12 | 62  | C            | NP      | 0.3                      | 0.2                  | 0.1                  | 0.7      | <0.1                   |
| Apr-12 | 69  | C            | NP      | <0.1                     | <0.1                 | <0.1                 | 0.3      | <0.1                   |
| Apr-12 | 72  | C            | NP      | 0.1                      | <0.1                 | <0.1                 | 0.3      | <0.1                   |
| Apr-12 | 74  | C            | NP      | <0.1                     | <0.1                 | <0.1                 | 0.5      | <0.1                   |
| Apr-12 | 77  | C            | NP      | 0.4                      | 0.2                  | 0.2                  | 0.8      | <0.1                   |
| Apr-12 | 27  | C            | P       | 0.3                      | 0.4                  | <0.1                 | 1.1      | <0.1                   |
| Apr-12 | 29  | C            | P       | <0.1                     | <0.1                 | <0.1                 | 0.3      | <0.1                   |

|        |     |              |         | Benzo(b,j,k)fluoranthene | Benzo(c)phenanthrene | Benzo(g,h,i)perylene | Chrysene | Dibenzo(a,h)anthracene |
|--------|-----|--------------|---------|--------------------------|----------------------|----------------------|----------|------------------------|
| Date   | Pot | Contaminated | Planted | mg/kg                    | mg/kg                | mg/kg                | mg/kg    | mg/kg                  |
| Apr-12 | 33  | C            | P       | <0.1                     | <0.1                 | <0.1                 | 0.2      | <0.1                   |
| Apr-12 | 38  | C            | P       | <0.1                     | <0.1                 | <0.1                 | 0.5      | <0.1                   |
| Apr-12 | 42  | C            | P       | <0.1                     | <0.1                 | <0.1                 | 0.3      | <0.1                   |
| Apr-12 | 78  | C            | P       | 0.2                      | 0.1                  | <0.1                 | 0.4      | <0.1                   |
| Apr-12 | 114 | NC           | NP      | <0.1                     | <0.1                 | <0.1                 | <0.1     | <0.1                   |
| Apr-12 | 116 | NC           | NP      | <0.1                     | <0.1                 | <0.1                 | <0.1     | <0.1                   |
| Apr-12 | 138 | NC           | NP      | <0.1                     | <0.1                 | <0.1                 | <0.1     | <0.1                   |
| Apr-12 | 142 | NC           | NP      | <0.1                     | <0.1                 | <0.1                 | <0.1     | <0.1                   |
| Apr-12 | 143 | NC           | NP      | <0.1                     | <0.1                 | <0.1                 | <0.1     | <0.1                   |
| Apr-12 | 157 | NC           | NP      | <0.1                     | <0.1                 | <0.1                 | <0.1     | <0.1                   |
| Apr-12 | 122 | NC           | P       | <0.1                     | <0.1                 | <0.1                 | <0.1     | <0.1                   |
| Apr-12 | 124 | NC           | P       | <0.1                     | <0.1                 | <0.1                 | <0.1     | <0.1                   |
| Apr-12 | 128 | NC           | P       | <0.1                     | <0.1                 | <0.1                 | <0.1     | <0.1                   |
| Apr-12 | 149 | NC           | P       | <0.1                     | <0.1                 | <0.1                 | <0.1     | <0.1                   |
| Apr-12 | 154 | NC           | P       | <0.1                     | <0.1                 | <0.1                 | <0.1     | <0.1                   |
| Apr-12 | 155 | NC           | P       | <0.1                     | <0.1                 | <0.1                 | <0.1     | <0.1                   |

| Date   | Pot | Contaminated | Planted | Dibenzo(a,i)pyrene | Dibenzo(a,h)pyrene | Dibenzo(a,l)pyrene | Dimethyl-7,12benzo(a)anthracene | Fluoranthene |
|--------|-----|--------------|---------|--------------------|--------------------|--------------------|---------------------------------|--------------|
|        |     |              |         | mg/kg              | mg/kg              | mg/kg              | mg/kg                           | mg/kg        |
| Oct-11 | 22  | C            | NP      | <0.1               | <0.1               | <0.1               | <0.1                            | 2.6          |
| Oct-11 | 62  | C            | NP      | <0.1               | <0.1               | 0.1                | <0.1                            | 15.5         |
| Oct-11 | 69  | C            | NP      | <0.1               | <0.1               | <0.1               | <0.1                            | 4            |
| Oct-11 | 72  | C            | NP      | <0.1               | <0.1               | <0.1               | <0.1                            | 9.7          |
| Oct-11 | 74  | C            | NP      | <0.1               | <0.1               | <0.1               | <0.1                            | 12.2         |
| Oct-11 | 77  | C            | NP      | <0.1               | <0.1               | <0.1               | <0.1                            | 9.5          |
| Oct-11 | 27  | C            | P       | <0.1               | <0.1               | <0.1               | <0.1                            | 8.4          |
| Oct-11 | 29  | C            | P       | <0.1               | <0.1               | <0.1               | <0.1                            | 5.2          |
| Oct-11 | 33  | C            | P       | <0.1               | <0.1               | <0.1               | <0.1                            | 4            |
| Oct-11 | 38  | C            | P       | <0.1               | <0.1               | <0.1               | <0.1                            | 10           |
| Oct-11 | 42  | C            | P       | <0.1               | <0.1               | <0.1               | <0.1                            | 1.3          |
| Oct-11 | 78  | C            | P       | <0.1               | <0.1               | <0.1               | <0.1                            | 16.8         |
| Oct-11 | 114 | NC           | NP      | <0.1               | <0.1               | <0.1               | <0.1                            | <0.1         |
| Oct-11 | 116 | NC           | NP      | <0.1               | <0.1               | <0.1               | <0.1                            | <0.1         |
| Oct-11 | 138 | NC           | NP      | <0.1               | <0.1               | <0.1               | <0.1                            | <0.1         |
| Oct-11 | 142 | NC           | NP      | <0.1               | <0.1               | <0.1               | <0.1                            | <0.1         |
| Oct-11 | 143 | NC           | NP      | <0.1               | <0.1               | <0.1               | <0.1                            | <0.1         |
| Oct-11 | 157 | NC           | NP      | <0.1               | <0.1               | <0.1               | <0.1                            | <0.1         |
| Oct-11 | 122 | NC           | P       | <0.1               | <0.1               | <0.1               | <0.1                            | <0.1         |
| Oct-11 | 124 | NC           | P       | <0.1               | <0.1               | <0.1               | <0.1                            | <0.1         |
| Oct-11 | 128 | NC           | P       | <0.1               | <0.1               | <0.1               | <0.1                            | <0.1         |
| Oct-11 | 149 | NC           | P       | <0.1               | <0.1               | <0.1               | <0.1                            | <0.1         |
| Oct-11 | 154 | NC           | P       | <0.1               | <0.1               | <0.1               | <0.1                            | <0.1         |
| Oct-11 | 155 | NC           | P       | <0.1               | <0.1               | <0.1               | <0.1                            | <0.1         |
| Apr-12 | 22  | C            | NP      | <0.1               | <0.1               | <0.1               | <0.1                            | 0.2          |
| Apr-12 | 62  | C            | NP      | <0.1               | <0.1               | <0.1               | <0.1                            | 0.7          |
| Apr-12 | 69  | C            | NP      | <0.1               | <0.1               | <0.1               | <0.1                            | 0.2          |
| Apr-12 | 72  | C            | NP      | <0.1               | <0.1               | <0.1               | <0.1                            | 0.2          |
| Apr-12 | 74  | C            | NP      | <0.1               | <0.1               | <0.1               | <0.1                            | 0.6          |
| Apr-12 | 77  | C            | NP      | <0.1               | <0.1               | <0.1               | <0.1                            | 0.5          |
| Apr-12 | 27  | C            | P       | <0.1               | <0.1               | <0.1               | <0.1                            | 1.9          |
| Apr-12 | 29  | C            | P       | <0.1               | <0.1               | <0.1               | <0.1                            | 0.1          |

| Date   | Pot | Contaminated | Planted | Dibenzo(a,i)pyrene<br>mg/kg | Dibenzo(a,h)pyrene<br>mg/kg | Dibenzo(a,l)pyrene<br>mg/kg | Dimethyl-7,12benzo(a)anthracene<br>mg/kg | Fluoranthene<br>mg/kg |
|--------|-----|--------------|---------|-----------------------------|-----------------------------|-----------------------------|------------------------------------------|-----------------------|
| Apr-12 | 33  | C            | P       | <0.1                        | <0.1                        | <0.1                        | <0.1                                     | 0.1                   |
| Apr-12 | 38  | C            | P       | <0.1                        | <0.1                        | <0.1                        | <0.1                                     | 0.7                   |
| Apr-12 | 42  | C            | P       | <0.1                        | <0.1                        | <0.1                        | <0.1                                     | 0.4                   |
| Apr-12 | 78  | C            | P       | <0.1                        | <0.1                        | <0.1                        | <0.1                                     | 0.7                   |
| Apr-12 | 114 | NC           | NP      | <0.1                        | <0.1                        | <0.1                        | <0.1                                     | <0.1                  |
| Apr-12 | 116 | NC           | NP      | <0.1                        | <0.1                        | <0.1                        | <0.1                                     | <0.1                  |
| Apr-12 | 138 | NC           | NP      | <0.1                        | <0.1                        | <0.1                        | <0.1                                     | <0.1                  |
| Apr-12 | 142 | NC           | NP      | <0.1                        | <0.1                        | <0.1                        | <0.1                                     | <0.1                  |
| Apr-12 | 143 | NC           | NP      | <0.1                        | <0.1                        | <0.1                        | <0.1                                     | <0.1                  |
| Apr-12 | 157 | NC           | NP      | <0.1                        | <0.1                        | <0.1                        | <0.1                                     | <0.1                  |
| Apr-12 | 122 | NC           | P       | <0.1                        | <0.1                        | <0.1                        | <0.1                                     | <0.1                  |
| Apr-12 | 124 | NC           | P       | <0.1                        | <0.1                        | <0.1                        | <0.1                                     | <0.1                  |
| Apr-12 | 128 | NC           | P       | <0.1                        | <0.1                        | <0.1                        | <0.1                                     | <0.1                  |
| Apr-12 | 149 | NC           | P       | <0.1                        | <0.1                        | <0.1                        | <0.1                                     | <0.1                  |
| Apr-12 | 154 | NC           | P       | <0.1                        | <0.1                        | <0.1                        | <0.1                                     | <0.1                  |
| Apr-12 | 155 | NC           | P       | <0.1                        | <0.1                        | <0.1                        | <0.1                                     | <0.1                  |

| Date   | Pot | Contaminated | Planted | Fluorene<br>mg/kg | Indeno(1,2,3-cd)pyrene<br>mg/kg | Methyl-3cholanthrene<br>mg/kg | Naphthalene<br>mg/kg | Phenanthrene<br>mg/kg | Pyrene<br>mg/kg |
|--------|-----|--------------|---------|-------------------|---------------------------------|-------------------------------|----------------------|-----------------------|-----------------|
| Oct-11 | 22  | C            | NP      | 0.9               | <0.1                            | <0.1                          | 0.1                  | 3.9                   | 7.3             |
| Oct-11 | 62  | C            | NP      | 7.4               | 0.3                             | <0.1                          | 0.5                  | 54.9                  | 33.6            |
| Oct-11 | 69  | C            | NP      | 0.5               | <0.1                            | <0.1                          | 0.1                  | 6.8                   | 8               |
| Oct-11 | 72  | C            | NP      | 0.5               | <0.1                            | <0.1                          | 0.3                  | 8.9                   | 22              |
| Oct-11 | 74  | C            | NP      | 3                 | 0.1                             | <0.1                          | 0.3                  | 28.9                  | 20.8            |
| Oct-11 | 77  | C            | NP      | 1.7               | 0.2                             | <0.1                          | 0.3                  | 13.9                  | 19.3            |
| Oct-11 | 27  | C            | P       | 2.4               | 0.1                             | <0.1                          | 0.2                  | 16                    | 19.4            |
| Oct-11 | 29  | C            | P       | 0.7               | <0.1                            | <0.1                          | 0.2                  | 3                     | 10.3            |
| Oct-11 | 33  | C            | P       | 0.9               | <0.1                            | <0.1                          | 0.2                  | 5.6                   | 9.4             |
| Oct-11 | 38  | C            | P       | 2.3               | 0.1                             | <0.1                          | 0.2                  | 25.1                  | 18.6            |
| Oct-11 | 42  | C            | P       | 0.3               | <0.1                            | <0.1                          | 0.2                  | 2.5                   | 3.6             |
| Oct-11 | 78  | C            | P       | 2.1               | 0.1                             | <0.1                          | 0.3                  | 19                    | 31.1            |
| Oct-11 | 114 | NC           | NP      | <0.1              | <0.1                            | <0.1                          | <0.1                 | <0.1                  | <0.1            |
| Oct-11 | 116 | NC           | NP      | <0.1              | <0.1                            | <0.1                          | <0.1                 | <0.1                  | <0.1            |
| Oct-11 | 138 | NC           | NP      | <0.1              | <0.1                            | <0.1                          | <0.1                 | <0.1                  | <0.1            |
| Oct-11 | 142 | NC           | NP      | <0.1              | <0.1                            | <0.1                          | <0.1                 | <0.1                  | <0.1            |
| Oct-11 | 143 | NC           | NP      | <0.1              | <0.1                            | <0.1                          | <0.1                 | <0.1                  | <0.1            |
| Oct-11 | 157 | NC           | NP      | <0.1              | <0.1                            | <0.1                          | <0.1                 | <0.1                  | <0.1            |
| Oct-11 | 122 | NC           | P       | <0.1              | <0.1                            | <0.1                          | <0.1                 | <0.1                  | <0.1            |
| Oct-11 | 124 | NC           | P       | <0.1              | <0.1                            | <0.1                          | <0.1                 | <0.1                  | <0.1            |
| Oct-11 | 128 | NC           | P       | <0.1              | <0.1                            | <0.1                          | <0.1                 | <0.1                  | <0.1            |
| Oct-11 | 149 | NC           | P       | <0.1              | <0.1                            | <0.1                          | <0.1                 | <0.1                  | <0.1            |
| Oct-11 | 154 | NC           | P       | <0.1              | <0.1                            | <0.1                          | <0.1                 | <0.1                  | <0.1            |
| Oct-11 | 155 | NC           | P       | <0.1              | <0.1                            | <0.1                          | <0.1                 | <0.1                  | <0.1            |
| Apr-12 | 22  | C            | NP      | <0.1              | <0.1                            | <0.1                          | 0.1                  | 0.2                   | 0.5             |
| Apr-12 | 62  | C            | NP      | 0.3               | <0.1                            | <0.1                          | 0.3                  | 1.6                   | 2.2             |
| Apr-12 | 69  | C            | NP      | <0.1              | <0.1                            | <0.1                          | 0.2                  | 0.3                   | 0.6             |
| Apr-12 | 72  | C            | NP      | 0.1               | <0.1                            | <0.1                          | 0.2                  | 0.4                   | 0.8             |
| Apr-12 | 74  | C            | NP      | 0.4               | <0.1                            | <0.1                          | 0.2                  | 1.1                   | 1.3             |
| Apr-12 | 77  | C            | NP      | 0.3               | 0.1                             | <0.1                          | 0.3                  | 0.8                   | 2.2             |
| Apr-12 | 27  | C            | P       | 0.4               | <0.1                            | <0.1                          | 0.2                  | 3                     | 5.1             |
| Apr-12 | 29  | C            | P       | 0.1               | <0.1                            | <0.1                          | 0.1                  | 0.2                   | 0.3             |





| Date   | Pot | Contaminated | Planted | Methyl-1naphthalene | Methyl-2naphthalene | Dimethyl-1,3naphthalene | Trimethyl-2,3,5naphthalene |
|--------|-----|--------------|---------|---------------------|---------------------|-------------------------|----------------------------|
|        |     |              |         | mg/kg               | mg/kg               | mg/kg                   | mg/kg                      |
| Oct-11 | 22  | C            | NP      | 0.1                 | 0.2                 | 0.6                     | 0.5                        |
| Oct-11 | 62  | C            | NP      | 0.8                 | 0.7                 | 7.6                     | 10.7                       |
| Oct-11 | 69  | C            | NP      | <0.1                | 0.1                 | 0.3                     | 0.8                        |
| Oct-11 | 72  | C            | NP      | 0.2                 | 0.3                 | 0.4                     | 1                          |
| Oct-11 | 74  | C            | NP      | 0.2                 | 0.3                 | 1.5                     | 2.9                        |
| Oct-11 | 77  | C            | NP      | 0.2                 | 0.3                 | 1                       | 2.1                        |
| Oct-11 | 27  | C            | P       | 0.3                 | 0.3                 | 3                       | 2.1                        |
| Oct-11 | 29  | C            | P       | 0.1                 | 0.2                 | 0.3                     | <0.1                       |
| Oct-11 | 33  | C            | P       | 0.2                 | 0.2                 | 1.2                     | 1                          |
| Oct-11 | 38  | C            | P       | 0.2                 | 0.2                 | 1.8                     | 3.4                        |
| Oct-11 | 42  | C            | P       | <0.1                | 0.1                 | 0.2                     | 0.3                        |
| Oct-11 | 78  | C            | P       | 0.3                 | 0.3                 | 1.7                     | 4.1                        |
| Oct-11 | 114 | NC           | NP      | <0.1                | <0.1                | <0.1                    | <0.1                       |
| Oct-11 | 116 | NC           | NP      | <0.1                | <0.1                | <0.1                    | <0.1                       |
| Oct-11 | 138 | NC           | NP      | <0.1                | <0.1                | <0.1                    | <0.1                       |
| Oct-11 | 142 | NC           | NP      | <0.1                | <0.1                | <0.1                    | <0.1                       |
| Oct-11 | 143 | NC           | NP      | <0.1                | <0.1                | <0.1                    | <0.1                       |
| Oct-11 | 157 | NC           | NP      | <0.1                | <0.1                | <0.1                    | <0.1                       |
| Oct-11 | 122 | NC           | P       | <0.1                | <0.1                | <0.1                    | <0.1                       |
| Oct-11 | 124 | NC           | P       | <0.1                | <0.1                | <0.1                    | <0.1                       |
| Oct-11 | 128 | NC           | P       | <0.1                | <0.1                | <0.1                    | <0.1                       |
| Oct-11 | 149 | NC           | P       | <0.1                | <0.1                | <0.1                    | <0.1                       |
| Oct-11 | 154 | NC           | P       | <0.1                | <0.1                | <0.1                    | <0.1                       |
| Oct-11 | 155 | NC           | P       | <0.1                | <0.1                | <0.1                    | <0.1                       |
| Apr-12 | 22  | C            | NP      | <0.1                | <0.1                | <0.1                    | <0.1                       |
| Apr-12 | 62  | C            | NP      | 0.2                 | 0.3                 | 0.2                     | 0.2                        |
| Apr-12 | 69  | C            | NP      | <0.1                | 0.1                 | <0.1                    | <0.1                       |
| Apr-12 | 72  | C            | NP      | 0.1                 | 0.2                 | <0.1                    | <0.1                       |
| Apr-12 | 74  | C            | NP      | <0.1                | 0.1                 | 0.2                     | 0.1                        |
| Apr-12 | 77  | C            | NP      | 0.1                 | 0.2                 | 0.1                     | <0.1                       |
| Apr-12 | 27  | C            | P       | 0.1                 | 0.2                 | 0.3                     | 0.3                        |
| Apr-12 | 29  | C            | P       | <0.1                | <0.1                | <0.1                    | <0.1                       |

| Date   | Pot | Contaminated | Planted | Methyl-1naphthalene<br>mg/kg | Methyl-2naphthalene<br>mg/kg | Dimethyl-1,3naphthalene<br>mg/kg | Trimethyl-2,3,5naphthalene<br>mg/kg |
|--------|-----|--------------|---------|------------------------------|------------------------------|----------------------------------|-------------------------------------|
| Apr-12 | 33  | C            | P       | <0.1                         | <0.1                         | <0.1                             | <0.1                                |
| Apr-12 | 38  | C            | P       | <0.1                         | 0.1                          | 0.1                              | <0.1                                |
| Apr-12 | 42  | C            | P       | <0.1                         | <0.1                         | 0.1                              | 0.1                                 |
| Apr-12 | 78  | C            | P       | <0.1                         | 0.1                          | 0.2                              | 0.2                                 |
| Apr-12 | 114 | NC           | NP      | <0.1                         | <0.1                         | <0.1                             | <0.1                                |
| Apr-12 | 116 | NC           | NP      | <0.1                         | <0.1                         | <0.1                             | <0.1                                |
| Apr-12 | 138 | NC           | NP      | <0.1                         | <0.1                         | <0.1                             | <0.1                                |
| Apr-12 | 142 | NC           | NP      | <0.1                         | <0.1                         | <0.1                             | <0.1                                |
| Apr-12 | 143 | NC           | NP      | <0.1                         | <0.1                         | <0.1                             | <0.1                                |
| Apr-12 | 157 | NC           | NP      | <0.1                         | <0.1                         | <0.1                             | <0.1                                |
| Apr-12 | 122 | NC           | P       | <0.1                         | <0.1                         | <0.1                             | <0.1                                |
| Apr-12 | 124 | NC           | P       | <0.1                         | <0.1                         | <0.1                             | <0.1                                |
| Apr-12 | 128 | NC           | P       | <0.1                         | <0.1                         | <0.1                             | <0.1                                |
| Apr-12 | 149 | NC           | P       | <0.1                         | <0.1                         | <0.1                             | <0.1                                |
| Apr-12 | 154 | NC           | P       | <0.1                         | <0.1                         | <0.1                             | <0.1                                |
| Apr-12 | 155 | NC           | P       | <0.1                         | <0.1                         | <0.1                             | <0.1                                |
